# Supplementary material
Source: Springer Nature journal article supplement (https://www.springermedizin.de/resource/supplementary/12967_2006_167_MOESM4_ESM.pdf/9575994)

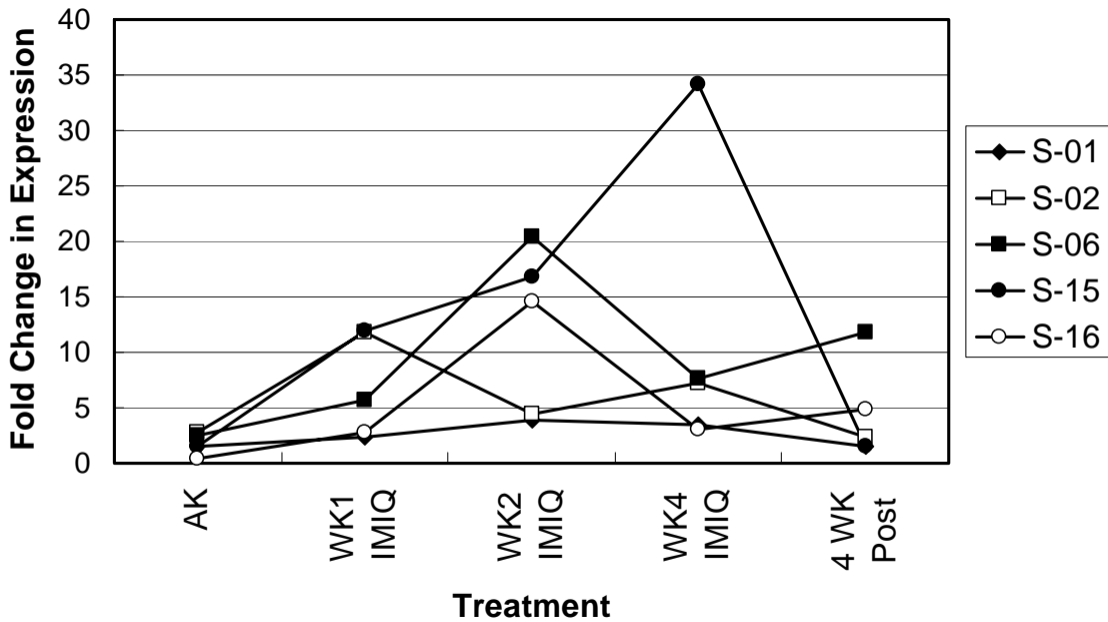

Supplement: MOESM4 [file 9575994]
